**TITLE:** Selection at the pathway level drives the evolution of gene-specific transcriptional noise

**AUTHORS:** Gustavo Valadares Barroso<sup>1</sup>; Natasa Puzovic<sup>1</sup> and Julien Y Dutheil<sup>1,2</sup>

**Affiliations:**

1) Max Planck Institute for Evolutionary Biology. Department of Evolutionary Genetics. August-Thienemann-Straße 2 24306 Plön – GERMANY

2) ISEM – Institut des Sciences de l'Évolution. UMR 5554, Université de Montpellier, Place Eugène Bataillon 34095 Montpellier cedex 05 – FRANCE

**Corresponding Author:**

Gustavo V. Barroso, Max Planck Institute for Evolutionary Biology. Department of Evolutionary Genetics. August-Thienemann-Straße 2, 24306 Plön – GERMANY.

## 16 **ABSTRACT:**

17 Because biochemical processes within individual cells involve a small number of molecules, they  
 18 are subject to random fluctuations. As a result, isogenic cell populations show different  
 19 concentrations of the same mRNA and protein, even in homogeneous conditions. The extent and  
 20 consequences of this stochastic gene expression have only recently been assessed on a genome-  
 21 wide scale, in particular thanks to the advent of single cell transcriptomics. Yet the evolutionary  
 22 forces shaping this stochasticity remain to be unraveled. We took advantage of recently published  
 23 data sets of the single cell transcriptome of the domestic mouse *Mus musculus* to characterize the  
 24 genomic patterns of transcriptional stochasticity. We show that noise levels in the mRNA  
 25 distributions (*a.k.a.* transcriptional noise) significantly correlate with nuclear domain organization,  
 26 gene function and gene age. Position of the encoded protein in biological pathways, however, is the  
 27 main factor that explains observed levels of transcriptional noise. We argue that these results are  
 28 consistent with models of noise propagation within gene networks. Altogether, transcriptional noise  
 29 appears to be under widespread selection and therefore constitutes an important of the phenotypical  
 30 component. Differences in variance of expression – not only in mean expression level – potentially  
 31 constitute a mechanism of adaptation and should be considered by functional and evolutionary  
 32 studies of gene expression.

## 33 Introduction

34 Isogenic cell populations display phenotypic variability even in homogeneous environments  
 35 (Spudich and Koshland 1976). This observation challenged the clockwork view of the intra-cellular  
 36 molecular machinery and led to the recognition of the stochastic nature of gene expression. Because  
 37 biochemical reactions result from the interactions of individual molecules in small numbers  
 38 (Gillespie 1977), the inherent stochasticity of binding and diffusion processes generates noise along  
 39 the biochemical cascade leading to the synthesis of a protein from its encoding gene (**Figure 1**). The  
 40 study of stochastic gene expression (SGE), also referred to as expression noise, classically  
 41 recognizes two sources of noise. Following the definition introduced by Elowitz et al (Elowitz et al.  
 42 2002), extrinsic noise results from variation in concentration, state and location of shared key  
 43 molecules involved in the reaction cascade from transcription initiation to protein folding. This is  
 44 because molecules that are shared among genes are typically present in low copy numbers relative  
 45 to the number of genes actively transcribed (Shahrezaei and Swain 2008). Extrinsic factors also  
 46 include physical properties of the cell such as size and growth rate, likely to impact the diffusion  
 47 process of all molecular players. Extrinsic factors therefore affect every gene in a cell equally.  
 48 Conversely, intrinsic factors generate noise in a gene-specific manner. They involve, for example,  
 49 the strength of cis-regulatory elements (Suter et al. 2011) as well as the stability of the mRNA  
 50 molecules that are transcribed (McAdams and Arkin 1997; Thattai and Oudenaarden 2001). Every  
 51 gene is affected by both sources of stochasticity and the relative importance of each has been  
 52 discussed in the literature (Becskei et al. 2005; Raj and Oudenaarden 2008). Shahrezaei and Swain  
 53 (Shahrezaei and Swain 2008) proposed a more general and explicit definition for any system, where  
 54 intrinsic stochasticity is “generated by the dynamics of the system from the random timing of  
 55 individual reactions” and extrinsic stochasticity is “generated by the system interacting with other  
 56 stochastic systems in the cell or its environment”. This generic definition therefore includes Raser  
 57 and O’Shea’s (Raser and O’Shea 2005) suggestion to further distinguish extrinsic noise occurring  
 58 “within pathways” and “between pathways”. Other intermediate organization levels of gene  
 59 expression are also likely to affect expression noise, such as chromatin structure (Blake et al. 2003;  
 60 Hebenstreit 2013), and three-dimensional genome organization (Pombo and Dillon 2015).

61 Pioneering work by Fraser et al (Fraser et al. 2004) has shown that SGE is an evolvable trait which  
 62 is subject to natural selection. First, genes involved in core functions of the cell are expected to  
 63 behave more deterministically (Barkai and Leibler 1999) because temporal oscillations in the  
 64 concentration of their encoded proteins are likely to have a deleterious effect. Second, genes  
 65 involved in immune response (Arkin et al. 1998; Norman et al. 2015) and response to  
 66 environmental conditions can benefit from being unpredictably expressed in the context of selection

67 for bet-hedging (Thattai and Oudenaarden 2004). As the relation between fitness and stochasticity  
68 depends on the function of the underlying gene, selection on SGE is expected to act mostly at the  
69 intrinsic level (Newman et al. 2006; Lehner 2008; Wang and Zhang 2011). The molecular  
70 mechanisms by which natural selection operates to regulate expression noise, however, remain to be  
71 elucidated.

72 Due to methodological limitations, seminal studies on SGE (both at the mRNA and protein levels)  
73 have focused on only a handful of genes (Elowitz et al. 2002; Ozbudak et al. 2002; Chubb et al.  
74 2006). The canonical approach consists in selecting genes of interest and recording the change of  
75 their noise levels in a population of clonal cells as a function of either (1) the concentration of the  
76 molecule that allosterically controls affinity of the transcription factor to the promoter region of the  
77 gene (Blake et al. 2003; Bar-even et al. 2006) or (2) mutations artificially imposed in regulatory  
78 sequences (Ozbudak et al. 2002). In parallel with theoretical work (Kepler and Elston 2001;  
79 Kaufmann and van Oudenaarden 2007; Sánchez and Kondev 2008), these pioneering studies have  
80 provided the basis of our current understanding of the proximate molecular mechanisms behind  
81 SGE, namely complex regulation by transcription factors, architecture of the upstream region  
82 (including the presence of TATA box), translation efficiency and mRNA / protein stability (Eldar  
83 and Elowitz 2010). Measurements at the genome scale are however needed in order to go beyond  
84 gene idiosyncrasies and particular histories and test hypotheses about the evolutionary forces  
85 shaping SGE (Sauer et al. 2007).

86 The recent advent of single-cell RNA sequencing makes it possible to sequence the transcriptome of  
87 each individual cell in a collection of cell clones and to observe the variation of gene-specific  
88 mRNA quantities across cells. This gives access to a genome-wide assessment of transcriptional  
89 noise. While not accounting for putative noise resulting from the process of translation of mRNA  
90 into protein, transcriptional noise accounts for both noise generated by the transcription process and  
91 noise resulting from the degradation of mRNA molecules (**Figure 1**). Previous studies, however,  
92 have shown that transcription is a limiting step in gene expression, and that transcriptional noise is  
93 therefore a good proxy for expression noise (Newman et al. 2006; Taniguchi et al. 2011). Here, we  
94 used publicly available single-cell transcriptomics data sets to quantify gene-specific transcriptional  
95 noise and relate it to other genomic factors, including protein conservation and position in the  
96 interaction network, in order to uncover the molecular basis of selection on stochastic gene  
97 expression.

## 98 Results

### 99 A new measure of noise to study genome-wide patterns of stochastic 100 gene expression

101 We analyzed the dataset generated by Sasagawa et al (2013), which quantifies gene-specific  
102 amounts of mRNA as fragments per kilobase of transcripts per million mapped fragments (FPKM)  
103 values for each gene and each individual cell. Among these, we selected all genes in a subset  
104 containing 20 embryonic stem cells in G1 phase in order to avoid recording variance that is due to  
105 different cell types or cell-cycle phases. The Quartz-Seq sequencing protocol captures every poly-A  
106 RNA present in the cell at one specific moment, allowing to assess transcriptional noise. Following  
107 Shalek et al (2014) we first filtered out genes that were not appreciably expressed in order to reduce  
108 the contribution of technical noise to the total noise. For each gene we further calculated the mean  $\mu$   
109 in FPKM units and variance  $\sigma^2$  in FPKM<sup>2</sup> units, as well as two previously published measures of  
110 SGE: *Fano factor*, usually referred to as the bursty parameter, defined as  $\sigma^2/\mu$  and *Noise*, defined  
111 as the coefficient of variation squared ( $\sigma^2/\mu^2$ ). Both the variance and the *Fano factor* are  
112 monotonically increasing functions of the mean (**Figure 2A**). *Noise* is inversely proportional to  
113 mean expression (**Figure 2A**), in agreement with previous observations at the protein level (Bar-  
114 even et al. 2006; Taniguchi et al. 2011). While this negative correlation was theoretically predicted  
115 (Tao et al. 2007), it may confound the analyses of transcriptional noise at the genome level, because  
116 mean gene expression is under specific selective pressure (Pál et al. 2001). In order to disentangle  
117 these effects, we developed a new quantitative measure of noise, independent of the mean  
118 expression level of each gene. To achieve this we fitted a linear model in the log-space plot of  
119 variance *versus* mean and extracted the slope (a) and intercept (b) of the regression line. We defined  
120  $F^*$  as  $\sigma^2/(a \cdot \mu^b)$  (see Material and Methods) that is, the ratio of the observed variance over the  
121 variance component predicted by the mean expression level. Genes with  $F^* < 1$  have a variance  
122 lower than expected according to their mean expression whereas genes with  $F^* > 1$  behave the  
123 opposite way (**Figure 2A**). As expected,  $F^*$  displays no significant correlation with the mean  
124 (Kendall's tau = -0.009, p-value = 0.106, **Figure 2B**). We therefore use  $F^*$  as a measure of SGE  
125 throughout this study.

## 126 **Stochastic gene expression correlates with the three-dimensional, but** 127 **not one-dimensional, structure of the genome**

128 We first sought to investigate whether genome organization significantly impacts the patterns of  
129 stochastic gene expression. We assessed whether genes in proximity along chromosomes display  
130 more similar amount of transcriptional noise than distant genes. We tested this hypothesis by  
131 computing for each pair of genes their primary distance on the genome, as well as their relative  
132 difference in transcriptional noise (see Methods). We found no significant association between the  
133 two distances (Mantel tests, each chromosome tested independently). Neighbor genes in one  
134 dimension, however, have significantly more similar transcriptional noise than non-neighbor genes  
135 (permutation test,  $p$ -value  $< 1e-3$ , **Figure S1**). Using Hi-C data from mouse embryonic cells (Dixon  
136 et al. 2012), we report that genes in proximity in three-dimensions have significantly more similar  
137 transcriptional noise than genes not in contact (permutation test,  $p$ -value  $< 1e-3$ , **Figure S1**). Most  
138 neighbor genes in one-dimension also appear to be close in three-dimensions and the effect of 3D  
139 contact is stronger than that of 1D contact. These results therefore suggest that the three-  
140 dimensional structure of the genome has a stronger impact on stochastic gene expression than the  
141 position of the genes along the chromosomes. We further note that while highly significant, the size  
142 of this effect is small, with a difference in relative expression of -1.12% (**Figure S1**).

## 143 **Low noise genes are enriched for housekeeping functions**

144 We investigated the function of genes at both ends of the  $F^*$  spectrum. We defined as candidate  
145 gene sets the top 10% least noisy or the top 10% most noisy genes in our data set, and tested for  
146 enrichment of GO terms and Reactome pathways (see Methods). It is expected that genes encoding  
147 proteins participating in housekeeping pathways are less noisy because fluctuations in concentration  
148 of their products might have stronger deleterious effects (Pedraza and van Oudenaarden 2005). On  
149 the other hand, stochastic gene expression could be selectively advantageous for genes involved in  
150 immune and stress response, as part of a bet-edging strategy (eg Arkin et al. 1998; Shalek et al.  
151 2013). While we do not find any significantly enriched Reactome pathway in the high noise gene  
152 set, a total of 37 pathways were significantly over-represented in the low-noise gene set (false  
153 discovery rate set to 1%). Interestingly, the top most significant pathways belong to modules related  
154 to translation (initiation, elongation, termination as well as ribosomal assembly), as well as several  
155 modules relating to gene expression, including chromatin regulation and mRNA splicing (**Figure**  
156 **3**). GO terms enrichment tests lead to similar results (**Table 1**): we found the molecular functions  
157 “nucleic acid binding” and “structural constituent of ribosome”, the biological processes  
158 “nucleosome assembly”, “innate immune response in mucosa” and “translation”, as well as the

cellular component “nuclear nucleosome” to be enriched in the low noise gene set. All these terms but one relate to gene expression.

The lack of significantly enriched Reactome pathways by high noise genes can potentially be explained by the nature of the data set: as the original experiment was based on unstimulated cells, genes that directly benefit from high SGE might not be expressed in these experimental conditions. In accordance, high-noise genes are not found to be enriched for any GO term.

## Highly connected proteins are synthesized by low-noise genes

The structure of the interaction network of proteins inside the cell can greatly impact the evolutionary dynamics of genes (Jeong et al. 2000; Barabási and Oltvai 2004). Furthermore, the contribution of each constitutive node within a given network varies. This asymmetry is largely reflected in the power-law-like degree distribution that is observed in virtually all biological networks (Barabási and Albert 1999) with a few genes displaying a lot of connections and a majority of genes displaying only a few. The individual characteristics of each node in a network can be characterized by various measures of centrality (Newmann 2003). Following previous studies on protein evolutionary rate (Fraser et al. 2002; Hahn et al. 2004; Jovelín and Phillips 2009) we asked whether, at the gene level, there is a link between centrality of a protein and the amount of transcriptional noise as measured by  $F^*$ , using five centrality metrics measured from the graphs provided by the Reactome database (Croft et al. 2014). Our data set encompasses 13,660 genes for which both gene expression data and pathway annotations were available.

We first estimated the pleiotropy index of single genes by counting in how many different pathways the corresponding proteins are involved in. We then computed centrality measures as averages over all pathways in which each gene is involved. A principal component analysis revealed two groups of measures (Figure S2). The first measures are related to the number of interacting partners of a given protein. These measures are all negatively correlated with transcriptional noise: the more central a protein is, the less transcriptional noise it displays (Table 2). The most simple measure of centrality of a node is its degree, that is, the number of nodes it is directly connected with (Kendall's tau = -0.071, p-value = 6.27e-11; Table 2): the more connections a protein makes, the less noisy its synthesis is. The hub score and authority score are both calculated from the adjacency matrix of a graph, which describes the distribution of edges among the nodes. The hub score estimates the extent to which a node links to other influent nodes and the authority score estimates the importance of a node by assessing how many hubs link to it. Both scores negatively correlate similarly with  $F^*$  (Hub score: Kendall's tau = -0.073, p-value = 1.474e-11; Authority score: Kendall's tau = -0.068, p-value = 3.652e-10). We also observed that pleiotropy is negatively correlated with  $F^*$  (Kendall's tau = -0.049, p-value = 1.149e-05; Table 2), although to a lesser extent. This effect is most likely



193 explained by the fact that pleiotropic genes are themselves more central (e.g. correlation of  
194 pleiotropy and node degree: Kendall's tau = 0.229, p-value < 2.2e-16). Altogether, these results  
195 suggest that natural selection acts to reduce expression noise in genes encoding highly connected  
196 proteins.

197 The two measures of centrality "closeness" and "betweenness" are highly correlated with each  
198 other, but are independent of the degree measures (**Figure S2**). Closeness is a measure of the  
199 topological distance between a node and every other reachable node. The fewer steps (edge hops) it  
200 takes for a protein to reach every other protein in a network, the higher its closeness. We do not find  
201 any significant relation between  $F^*$  and the closeness value of genes (Kendall's tau = -0.005, p-  
202 value = 0.663). Similarly, betweenness is proportional to the frequency with which a protein  
203 belongs to the shortest path between every pair of nodes. In modular networks (Hartwell et al. 1999)  
204 nodes that connect different modules are extremely important to the cell (Guimera and Amaral  
205 2005) and are implied to show high betweenness scores. The same was pointed out by Joy et al (Joy  
206 et al. 2005) who showed that in yeast, high betweenness proteins tend to be older and more  
207 essential, which we also see in our data set (Betweenness vs gene age, Kendall's tau = 0.077, p-  
208 value = 7.569e-10; Betweenness vs Ka/Ks, Kendall's tau = -0.077, p-value = 7.818e-12). It has been  
209 argued, however, that in protein-protein interaction networks high betweenness proteins are less  
210 essential due to the lack of directed information flow, compared to, for instance, regulatory  
211 networks (Yu et al. 2007). In agreement with this latter hypothesis, we do not find any significant  
212 correlation between betweenness and transcriptional noise (Kendall's tau = -0.014, p-value = 0.206),  
213 and report that degree measures are better predictors of constraints in SGE than betweenness.

214 It was previously shown that centrality negatively correlates with evolutionary rate (Hahn and Kern  
215 2004). Our results suggest that central genes are selectively constrained for their transcriptional  
216 noise such that centrality also influences the regulation of gene expression. Interestingly, it has been  
217 reported that central genes tend to be more duplicated (Vitkup et al. 2006). The authors proposed  
218 that such duplication events would have been favored as they would confer greater robustness to  
219 deleterious mutations in proteins. Our results suggest another, non exclusive, possible advantage:  
220 having more gene copies could reduce transcriptional noise by averaging the amount of transcripts  
221 produced by each gene copy (Raser and O'Shea 2005).

## 222 **Network structure impacts transcriptional noise of constitutive genes**

223 Whereas estimators of node centrality highlight gene-specific properties inside a given network,  
224 measures at the whole-network level enable the comparison of networks with distinct properties.  
225 We computed the size, diameter and transitivity for each annotated network in our data set (1,364  
226 networks, Supplementary Material), as well as average measures of node scores (degree, hub score,



authority score, closeness, betweenness) which we compare with the average  $F^*$  measure of all constitutive nodes. The size of a network is defined as its total number of nodes, while diameter is the length of the shortest path between the two most distant nodes. Transitivity is a measure of connectivity, defined as the average of all nodes' clustering coefficients, itself defined for each node as the proportion of its neighbors that also connect to each other. Interestingly, while network size is positively correlated with average degree and transitivity (Kendall's tau = 0.372, p-value < 2.2e-16 and Kendall's tau = 0.119, p-value = 2.807, respectively), diameter displays a positive correlation with average degree (Kendall's tau = 0.202, p-value < 2.2e-16) but a negative correlation with transitivity (Kendall's tau = -0.115, p-value = 2.237e-08). This is because diameter increases logarithmically with size, that is, addition of new nodes to large networks do not increase the diameter as much as additions to small networks. This suggests that larger networks are relatively more compact than smaller ones, and their constitutive nodes are therefore more connected. We find that average transcriptional noise correlates negatively with network size (Kendall's tau = -0.0594, p-value = 0.001376), while being independent of the diameter (Kendall's tau = 0.0125, p-value = 0.5366). Transcriptional noise is also strongly negatively correlated with all averaged centrality measures (**Table 3**). These results are in line with the node-based analyses, and show that the more connections a network has, the less stochastic the expression of the underlying genes is. This supports the view of Raser and O'Shea (Raser and O'Shea 2005) that the gene-extrinsic, pathway-intrinsic level is functionally pertinent and needs to be distinguished from the globally extrinsic level.

We further asked whether genes with similar transcriptional noise tend to synthesize proteins that connect to each other (positive assortativity) in a given network, or on the contrary, tend to avoid each other (negative assortativity). We considered all Reactome pathways annotated to the mouse and estimated their respective  $F^*$  assortativity. We found the mean assortativity to be significantly negative, with a value of -0.131 (one sample Wilcoxon rank test, p-value < 2.2e-16), meaning that proteins with different  $F^*$  values tend to connect with each other (**Figure S3**). Maslov & Sneppen (Maslov and Sneppen 2002) reported a negative assortativity between hubs in protein-protein interaction networks, which they hypothesized to be the result of selection for reduced vulnerability to deleterious perturbations. In our data set, however, we find the assortativity of hub scores to be slightly but significantly positive (average of 0.060, one sample Wilcoxon rank test, p-value = 0.0002702, **Figure S3**), although with a large distribution of assortativity values. As we showed that hub scores correlates negatively with  $F^*$  (**Table 2**), we asked whether the negative assortativity of hub proteins can at least partly explain the negative assortativity of  $F^*$ . We found a significantly positive correlation between the two assortativity measures (Kendall's tau = 0.338, p-value < 2.2e-16). The relationship between the measures, however, is not linear. A Multivariate Adaptive

Regression Spline was fitted to the two assortativity measures and resulted in a selected model with a strong positive correlation for hub score assortativity below -0.16, and virtually no correlation above (**Figure S3**), suggesting a distinct relationship between hub score and  $F^*$  for negative and positive hub score assortativity. Negative assortativity of hub proteins contributes to a negative assortativity of SGE (Kendall's tau = 0.381, p-value < 2.2e-16), while for pathways with positive hub score assortativity the effect disappears (Kendall's tau = 0.052, p-value = 0.06282). While assortativity of  $F^*$  is closer to 0 for pathways with positive assortativity of hub score, we note that it is still significantly negative (average = -0.047, one sample Wilcoxon test with p-value < 2.2e-16). This suggests the existence of additional constraints that act on the distribution of noisy proteins in a network.

## **Transcriptional noise is positively correlated with the evolutionary rate of proteins**

Evolutionary divergence between orthologous coding sequences in yeast has been shown to correlate negatively with fitness effect on knock-out strains of the corresponding genes (Hirsh and Fraser 2001) demonstrating that protein functional importance is reflected in the strength of purifying selection acting on it. Fraser et al (Fraser et al. 2004) studied transcription and translation rates of genes in the yeast *Saccharomyces cerevisiae*, and classified genes in distinct noise categories according to their expression strategies. They reported that genes with high fitness effect display lower expression noise than the rest. Following these early observations, we hypothesized that genes under strong purifying selection at the protein sequence level should also be highly constrained for their expression and therefore display a lower transcriptional noise. To test this hypothesis, we correlated  $F^*$  with the ratio of non-synonymous ( $K_a$ ) to synonymous substitutions ( $K_s$ ), as measured by sequence comparison between mouse genes and their human orthologs, after discarding genes with evidence for positive selection ( $n = 5$ ). In agreement with our prediction, we report a significantly positive correlation between the  $K_a / K_s$  ratio and  $F^*$  (**Figure 4**, Kendall's tau = 0.0619, p-value < 2.2e-16), that is, highly constrained genes display less transcriptional noise than fast evolving ones. These results demonstrate that purifying selection is acting on expression noise in addition to the protein sequence and mean expression level.

## **Older genes are less noisy than younger ones**

Evolution of new genes was long thought to occur via duplication and modification of existing genetic material ("evolutionary tinkering", (Jacob 1977)). Evidence for *de novo* gene emergence is however becoming more and more common (Tautz and Domazet-Lošo 2011; Xie et al. 2012). *De*

294 *nov* created genes undergo several optimization steps, including their integration into a regulatory  
 295 network (Neme and Tautz 2013). We tested whether this historical process of incorporation into  
 296 pathways impacts the evolution of transcriptional noise. As older genes tend to be more conserved  
 297 (Wolf et al. 2009), we further controlled for sequence conservation, as measured by the  $K_a / K_s$   
 298 ratio of the gene. We used the phylostratigraphic approach of Neme & Tautz (Neme and Tautz  
 299 2013), which categorizes genes into 20 strata, to compute gene age and tested for a correlation with  
 300  $F^*$ , correcting for sequence divergence as a putative covariate (**Figure 4**, Kendall's tau = -0.047, p-  
 301 value = 3.001e-13; partial correlation controlling for gene sequence conservation). This negative  
 302 correlation still holds when we discard very recent *de novo* genes (belonging to Phylostratum 20) to  
 303 minimize influence of putative annotation errors (Kendall's tau = -0.047, p-value = 3.534e-13).  
 304 These results suggest that older genes are more deterministically expressed while younger genes are  
 305 more noisy, independently of the selective pressure acting on them.

306 Biological network growth is currently thought to occur by preferential attachment (Jeong et al.  
 307 2001): the more edges a node has, the more likely this node is to make yet another edge with a  
 308 newly arrived protein. This would lead to older genes playing more central roles in more pathways,  
 309 and therefore explain the correlation of  $F^*$  and gene age. Under this hypothesis, we expect the  
 310 centrality of a gene to positively correlate with gene age. However, we observe the opposite trend  
 311 (average degree vs gene age, Kendall's tau = -0.090, p-value = 3.578e-13), indicating that older  
 312 proteins actually tend to have fewer edges. A possible explanation to this trend is that older genes  
 313 are under stronger purifying selection (gene age vs  $K_a / K_s$ , Kendall's tau = -0.139; p-value < 2.2e-  
 314 16) preventing them from linking to many younger proteins, indicating that the preferential  
 315 attachment model is an oversimplification of how intra-cellular network growth is achieved  
 316 (Barabási and Oltvai 2004; Kim et al. 2013). In the same vein, gene age is not associated with  
 317 higher pleiotropy (pleiotropy vs gene age: Kendall's tau = -0.012, p-value = 0.353). To see if this  
 318 inverted preferential attachment could be explained by distinct constraints on more ancient  
 319 housekeeping genes, we tested for the same correlations using only younger genes (*i.e.*, genes from  
 320 Phylostrata 7, Bilateria, to 20, *Mus musculus*, which are not enriched for any particular  
 321 housekeeping function [ $n = 1048$ ]). This time we observe a positive, albeit non-significant  
 322 correlation (average degree vs. gene age: Kendall's tau = 0.053, p-value = 0.2953), indicating that  
 323 more ancient genes evolve their connectivity differently from younger ones. The effect of gene age  
 324 on transcriptional noise therefore appears independent of the effect of selective constraints and  
 325 position of genes in the network. While we cannot rule out that functional constraints not fully  
 326 accounted for by the  $K_a / K_s$  ratio or unavailable functional annotations explain at least partially the  
 327 correlation of gene age and transcriptional noise, a possible hypothesis is that ancient gene have  
 328 acquired more complex regulation schemes through time. Higher order interaction in the regulation

network involve for instance negative feedback loops, which have been shown to stabilize gene expression and reduce expression noise (Becskei and Serrano 2000; Thattai and Oudenaarden 2001).

## **Position in the protein network is the main driver of transcriptional noise**

Since network topology measures, Ka / Ks ratio and gene age are correlated variables, we sought at disentangling potential confounding effects by modeling the patterns of transcriptional noise as a function of all predictive factors, as well as their interactions. Because network centrality measures are themselves not independent from each other, we used the first axis of the principal component analysis of network variables (**Figure S2**) as a synthetic measure of node centrality. This measure essentially captures the effect of nodes degree, hub and transitivity scores (**Figure S2**) and is negatively correlated with F\* (Kendall's tau = -0.075, p-value = 2.858e-12, **Figure 4**). We then constructed a linear model with F\* as a response variable, and synthetic network centrality (SynthNet, explaining 43.32% of the total inertia), sequence conservation (Ka / Ks) and gene age as explanatory variables, as well as all their possible interactions. We conducted a model selection procedure where we allowed for interactions between variables of up to three degrees and tested significance of coefficients on the selected model, controlling for various model departures (see Methods and **Table 4** for results). All individual variables are retained, as well as the interaction term between Ka / Ks and gene age. When taken together, only the network centrality measure and gene age are significant (**Table 4**), and the coefficients in the multiple regression have the same sign as the non-parametric correlation coefficients observed for F\*. All variables explain 2.98% of variance together. This small value indicates either that gene idiosyncrasies largely predominate over general effects, or that our estimates of transcriptional noise have a large measurement error, or both. An analysis of variance shows that the three individual variables explain a significant part of the variance, with centrality measures explaining the largest part (SynthNet variable, 1.62% variance explained, Fisher's test p-value = 9.552e-15). Gene age only explains 0.99% of the variance (Fisher's test p-value = 1.386e-09) and functional constraints 0.31% (Ka / Ks variable, Fisher's test p-value = 0.0006567). This suggests that position in protein network is the main driver of the evolution of gene-specific stochastic expression. It also suggests that gene age has an effect on F\* independent of the strength of purifying selection on the genes.

We further included the effect of three-dimensional organization of the genome in order to assess whether it could be a confounding factor. We developed a correlation model allowing for genes in contact to have correlated values of transcriptional noise. The correlation model was fitted together with the previous linear model in the generalized least square (GLS) framework. This model allows

for one additional parameter,  $\lambda$ , which captures the strength of correlation due to three-dimensional organization of the genome (see Methods). The estimate of  $\lambda$  was found to be 0.0029, which means that the spatial autocorrelation of transcriptional noise is low on average. While this estimate is significantly higher than zero, model comparison using Akaike's information criterion favors the linear model without three-dimensional correlation. Consistently, accounting for this correlation does not change significantly our estimates (**Table 4**), confirming network centrality measures as the main factor explaining the distribution of transcriptional noise.

## **Analysis of bone marrow-derived dendritic cells supports the generality of the results to other cell types**

We assessed the reproducibility of our results by analyzing an additional single-cell transcriptomics data set of 95 unstimulated bone marrow-derived dendritic cells (Shalek et al. 2014). After filtering (see Methods), the data set consisted of 11,640 genes. Using the same normalization procedure as for the Sasagawa data set, we nonetheless report a weak but significant negative correlation between  $F^*$  and the mean expression (-0.068, p-value < 2.2e-16). Despite this correlation, the patterns we observed with the bone marrow-derived dendritic cells dataset are qualitatively and quantitatively consistent with the ones obtained with embryonic stem cells (**Table S1**), supporting the generality of our observations to other cell types. This dataset further revealed a significant negative correlation of  $F^*$  with closeness and betweenness.

## **Biological, not technical noise is responsible for the observed patterns**

The variance in gene expression measured from single-cell transcriptomics is a combination of biological and technical variance. While the two sources of variance are a priori independent, gene-specific technical variance has been observed in micro-array experiments (Pozhitkov et al. 2007) making a correlation of the two types of variance plausible. If similar effects also affect RNA-Seq experiments, technical variance could be correlated to gene function and therefore act as a covariate in our analyses. In order to assess whether this is the case, we used the dataset of Shalek et al (Shalek et al. 2013), which contains both single-cell transcriptomics and 3 replicates of 10,000 pooled-cell RNA sequencing. In traditional RNA sequencing, which is typically performed on pooled populations of several thousands of cells, biological variance is averaged out so that the resulting measured variance between replicates is essentially the result of technical noise. We computed the mean and variance in expression of each gene across the three populations of cells. By plotting the variance versus the mean in log-space, we were able to compute a “technical”  $F^*$  ( $F_t^*$ ) value for each gene (Methods). We conducted our correlation analyses using  $F_t^*$  instead of

395  $F^*$ . We report no significant correlation between  $F_t^*$  and network centralities and gene age. There  
 396 is a significant correlation between  $F^*$  and sequence conservation (Kendall's tau = 0.036, p-value =  
 397 1.085e-06). However, this correlation is weaker than the one reported between  $F^*$  and sequence  
 398 conservation for the single-cell data set (Kendall's tau = 0.0619, p-value < 2.2e-16), thus not being  
 399 sufficient to explain the latter finding. At the pathway level, correlations with  $F^*$  are either non-  
 400 significant or go in the opposite direction than the ones observed in single-cell datasets. In addition,  
 401 there was no enrichment of the 10<sup>th</sup> and 90<sup>th</sup>  $F_t^*$  percentiles for any particular pathway or GO  
 402 term. These results support our conclusion that the correlations we observe are due to variations that  
 403 are biological, not technical.

## 404 Discussion

405 Throughout this work, we provided the first genome-wide evolutionary and systemic study of  
 406 transcriptional noise, using a mouse cell as a model. We have shown that transcriptional noise  
 407 correlates with functional constraints both at the level of the gene itself via the protein it encodes,  
 408 but also at the level of the pathway(s) the gene belongs to. We further discuss here potential  
 409 confounding factors in our analyses and argue that our results are compatible with selection acting  
 410 to reduce noise-propagation at the network level.

411 In this study, we exhibited several factors explaining the variation in transcriptional noise between  
 412 genes. While highly significant, the effects we report are of small size, and we only explain a few  
 413 percent of the total observed variance. There are several possible explanations for this reduced  
 414 explanatory power: (1) transcriptional noise is a proxy for noise in gene expression, at which  
 415 selection occurs (**Figure 1**). As transcriptional noise is not randomly distributed across the genome,  
 416 it must constitute a significant component of expression noise, in agreement with previous  
 417 observations (Blake et al. 2003; Newman et al. 2006). Translational noise, however, might  
 418 constitute an important part of the expression noise and was not assessed in this study. (2) Gene  
 419 expression levels were assessed on embryonic stem cells in culture. Such an experimental system  
 420 may result in gene expression that differs from that in natural conditions under which natural  
 421 selection acted. (3) Functional annotations, in particular pathways and gene interactions are still  
 422 incomplete, and network-based measures have most likely large estimation errors. (4) While the  
 423 newly introduced  $F^*$  measure allowed us to assess the distribution of transcriptional noise  
 424 independently of the average mean expression – therefore constituting an improvement over  
 425 previous studies – it does not capture the full complexity of SGE. Explicit modeling, for instance  
 426 based in the Beta-Poisson model (Vu et al. 2016) is a promising avenue for the development of  
 427 more sophisticated quantitative measures.



428 In a pioneering study, Fraser et al, followed by Shalek et al, demonstrated that essential genes  
 429 whose deletion is deleterious and genes encoding subunits of molecular complexes (Fraser et al.  
 430 2004) as well as housekeeping genes (Shalek et al. 2013) display reduced gene expression noise.  
 431 Our findings go beyond these earlier observations as they reveal that network centrality measures  
 432 are the major explanatory factor of the distribution of transcriptional noise in the genome. This  
 433 suggests that selection at the pathway level is a widespread phenomenon that drives the evolution of  
 434 SGE at the gene level. This multi-level selection mechanism, we propose, can be explained by  
 435 selection against noise propagation within networks. It has been experimentally demonstrated that  
 436 expression noise can be transmitted from one gene to another gene with which it is interacting  
 437 (Pedraza and van Oudenaarden 2005). Large noise at the network level is deleterious (Barkai and  
 438 Leibler 1999) but each gene does not contribute equally to it, thus the strength of selective pressure  
 439 against noise varies among genes in a given network. We have shown that highly connected,  
 440 “central” proteins typically display reduced transcriptional noise. Such nodes are likely to constitute  
 441 key players in the flow of noise in intra-cellular networks as they are more likely to transmit noise  
 442 to other components. In accordance with this hypothesis, we find genes with the lowest amount of  
 443 transcriptional noise to be enriched for top-level functions, in particular involved in the regulation  
 444 of other genes.

445 These results have several implications for the evolution of gene networks. First, this means that  
 446 new connections in a network can potentially be deleterious if they link genes with highly stochastic  
 447 expression. Second, distinct selective pressures at the “regulome” and “interactome” levels (**Figure**  
 448 **1**) might act in opposite direction. We expect genes encoding highly connected proteins to have  
 449 more complex regulation schemes, in particular if their proteins are involved in several biological  
 450 pathways. In the simplest scenario of open chromatin and absence of transcription factors and  
 451 enhancers, each gene has a constant probability of being transcribed per time unit and the resulting  
 452 amount of transcripts follows a Poisson distribution with *Fano factor* equal to 1, that is, with  
 453 variance equal to mean expression (Raj and Oudenaarden 2008). The early evidence for widespread  
 454 bursty transcription, leading to overdispersion (variance > mean expression, (Raj et al. 2006; So et  
 455 al. 2011)) suggests that complex regulation leads to increased transcriptional noise. Subsequently,  
 456 several studies demonstrated that expression noise of a gene positively correlates with the number  
 457 of transcription factors controlling its regulation (Sharon et al. 2014). Central genes, while being  
 458 under negative selection against stochastic behavior, are then more likely to be controlled by  
 459 numerous transcription factors which will tend to increase transcriptional noise. As a consequence,  
 460 if the number of connections at the interactome level is highly correlated with the number of  
 461 connections at the regulome level, there must exist a trade-off in the number of connections a gene  
 462 can make in a network. Alternatively, highly connected genes might evolve regulatory systems



allowing them to uncouple these two levels: negative feedback loops, for instance, where the product of a gene down-regulates its own production have been shown to stabilize expression and significantly reduce stochasticity (Becskei and Serrano 2000; Dublanche et al. 2006; Tao et al. 2007). We therefore predict that negative feedback loops are more likely to occur at genes that are more central in protein networks, as they will confer a greater advantage in terms of SGE.

Our results enabled the identification of possible selective pressures acting on the level of stochasticity in gene expression. The mechanisms by which the amount of stochasticity can be controlled remain however to be elucidated. We evoked the existence of negative feedback loops which reduce stochasticity and the multiplicity of upstream regulator which increase it. Recent work by Wolf et al (Wolf et al. 2015) and Metzger et al (Metzger et al. 2015) add further perspective to this scheme. Wolf and colleagues found that in *Escherichia coli* noise is higher for natural than experimentally evolved promoters selected for their mean expression level. They hypothesized that higher noise is selectively advantageous in case of changing environments. On the other hand, the Metzger and colleagues found the signature of selection for reduced noise in natural populations of *Saccharomyces cerevisiae*. Together, these results provide additional evidence that the amount of stochasticity in the expression of every single gene has an optimum, with higher values being less advantageous because of noise propagation in the network the gene belongs to and lower values being suboptimal in case of changing environment because of less phenotypic plasticity.

## Conclusion

Using a new measure of transcriptional noise, our results demonstrate that the position of the protein in the interactome is a major driver of selection against stochastic gene expression. As such, transcriptional noise is an essential component of the phenotype, in addition to the mean expression level and the actual sequence and structure of the encoded proteins. This is currently an under-appreciated phenomenon, and gene expression studies that focus only on the mean expression of genes may be missing key information about expression diversity. The study of gene expression must consider changes in noise in addition to change in mean expression level as a putative explanation for adaptation. Further work aiming to unravel the exact structure of the regulome is however needed in order to fully understand how transcriptional noise is generated or inhibited.

## 491 **Material and Methods**

### 492 **Single-cell gene expression data set**

493 We used the dataset generated by Sasagawa et al. (Sasagawa et al. 2013) retrieved from the Gene  
 494 Expression Omnibus repository (accession number GSE42268). We analyzed expression data  
 495 corresponding to embryonic stem cells in G1 phase, for which more individual cells were  
 496 sequenced. A total of 17,063 genes had non-zero expression in at least one of the 20 single cells.  
 497 Similar to Shalek et al (Shalek et al. 2014), a filtering procedure was performed where only genes  
 498 whose expression level satisfied  $\log(\text{FPKM}+1) > 1.5$  in at least one single cell were kept for further  
 499 analyses. This filtering step resulted in a total of 13,660 appreciably expressed genes for which  
 500 transcriptional noise was evaluated, compared to 11,640 genes present in the filtered dataset of  
 501 Shalek et al (2014).

### 502 **Measure of transcriptional noise**

503 The mean ( $\mu$ ) and variance ( $\sigma^2$ ) of each gene over all single cells were computed. A linear  
 504 model was fitted on the log-transformed means and variances in order to estimate the coefficients of  
 505 the power law regression:

$$506 \quad \sigma^2 = a \cdot \mu^b \quad (\text{eqn 1})$$

$$507 \quad \log(\sigma^2) = \log(a) + b \cdot \log(\mu) \quad (\text{eqn 2})$$

508 We defined  $F^*$  as the ratio of the observed variance and the predicted variance:

$$509 \quad F^* = \frac{\sigma^2}{a \cdot \mu^b} \quad (\text{eqn 3})$$

510  $F^*$  can be seen as a general expression for the Fano factor ( $a = b = 1$ ) and noise measure ( $a = 1, b =$   
 511  $2$ ).  $F^*$  is the stochasticity measure unit with which we produced our results, after estimating the  $a$   
 512 and  $b$  parameters from the data.

### 513 **Genome architecture**

514 The mouse proteome from Ensembl (genome version: mm9) was used in order to get coordinates of  
 515 all genes. The Hi-C dataset for embryonic stem cells (ES) from Dixon et al (Dixon et al. 2012) was  
 516 used to get three-dimensional domain information. Two genes were considered in proximity in one  
 517 dimension (1D) if they are on the same chromosome and no protein-coding gene was found  
 518 between them. The primary distance (in number of nucleotides) between their midpoint coordinates  
 519 was also recorded as 1D a distance measure between the genes. Two genes were considered in  
 520 proximity in three dimensions (3D) if the normalized contact number between the two windows the

genes belong was non-null. Two genes belonging to the same window were considered in proximity. We further computed the relative difference of stochastic gene expression between two genes by computing the ratio  $(F_2^* - F_1^*) / (F_2^* + F_1^*)$ . For each chromosome, we independently tested if there was a correlation between the primary distance and the relative difference in stochastic gene expression with a Mantel test, as implemented in the ade4 package (Dray and Dufour, 2007). In order to test whether genes in proximity (1D and 3D) had more similar transcriptional noise than distant genes, we contrasted the relative differences in transcription noise between pairs of genes in proximity and pairs of distant genes. As we test all pairs of genes, we performed a randomization procedure in order to assess the significance of the observed differences by permuting the rows and columns in the proximity matrices 1,000 times. Linear models accounting for spatial interactions with genes were fitted using the generalized least squares (GLS) procedure as implemented in the “nlme” package for R (Pinheiro et al 2016). A correlation matrix between all tested genes was defined as  $G = \{g_{i,j}\}$ , where  $g_{i,j}$  is the correlation between genes i and j. We defined  $g_{i,j} = 1 - \exp(-\lambda \delta_{i,j})$ , where  $\delta_{i,j}$  takes 1 if genes i and j are in proximity, 0 otherwise. Parameter  $\lambda$  was estimated jointly with other model parameters, it measures the strength of the genome “spatial” correlation. Parameters were estimated using the maximum likelihood (ML) procedure, instead of the default restricted maximum likelihood (REML) in order to perform model comparison using Akaike’s information criterion (AIC).

## 539 **Biological pathways and network topology**

The 13,660 Ensembl ids in our dataset were mapped to 13,136 Entrez ids. We kept only genes with unambiguous mapping, resulting in 11,032 Entrez ids for the Reactome pathway analysis. We defined genes either in the top 10% least noisy or in the top 10% most noisy as candidate sets and used the Reactome PA package (Yu and He 2015) to search the mouse Reactome database for overrepresented pathways with a 1% false discovery rate. Thirteen thousand six hundred and sixty Ensembl ids mapped to a total of 29,859 UniProt ids. For network analyses, we removed UniProt ids which were not annotated to the Reactome database, resulting in a total of 4,929 UniProt ids after this first step. We then removed genes that mapped ambiguously from Ensembl to UniProt, retaining 3,959 Ensembl / UniProt ids for which we computed centrality measures. At the network level, size, transitivity and diameter could be calculated for every pathway using a combination of three R packages (“pathview” (Luo 2013), “igraph” (Csardi 2015) and “graphite” (Sales et al 2016)). As the calculation of assortativity does not handle missing data (that is, nodes of the pathway for which no value could be computed), we computed assortativity on the sub-network with nodes for which data were available. A principal

component analysis was conducted on all network centrality measures using the ade4 package for R (Dray et al 2007). Models of  $F^*$  assortativity measures were fitted and compared using Multivariate Adaptive Regression Splines, as implemented in the “earth” package in R (Milborrow 2016).

## Sequence divergence

The Ensembl's Biomart interface was used to retrieve the proportion of non-synonymous ( $K_a$ ) and synonymous ( $K_s$ ) divergence estimates for each mouse gene relative to the human ortholog. This information was available for 13,136 genes.

## Gene Age

The relative taxonomic ages of the mouse genes have been computed and is available in the form of 20 Phylostrata (Neme and Tautz 2013). Each Phylostratum corresponds to a node in the phylogenetic tree of life. Phylostratum 1 corresponds to “All cellular organisms” whereas Phylostratum 20 corresponds to “*Mus musculus*”, with other levels in between. We used this published information to assign each of our genes to a specific Phylostratum and used this as a relative measure of gene age: Age = 21 - Phylostratum, so that an age of 1 corresponds to genes specific to *M. musculus* and genes with an age of 20 are found in all cellular organisms.

## Linear modeling

The first axis (43.324% of the total variance) of the principal component analysis of centrality measures was used as a synthetic measure of centrality (variable SynthNet, see **Figure S2**). We built a linear model with  $F^*$  as a response variable and the three predictor variables SynthNet,  $K_a / K_s$  ratio and gene age, as well as their double and triple interactions. As the fitted model displayed significant departure to normality, it was further transformed using the Box-Cox procedure (“boxcox” function from the MASS package for R (Venables and Ripley 2002)). The Box-Cox transformed model was then subject to backward model selection in order to discard extra-numerous parameters. The selected model according to Akaike’s information criterion only contains single effects and the pairwise interaction between  $K_a / K_s$  and age. Residues of the selected model had independent residue distributions (Ljung-Box test, p-value = 0.09402) but still displayed slight departure to normality (Shapiro-Wilk test, p-value = 1.22e-7), and heteroscedasticity (Harrison-McCabe test, p-value = 0.001333). In order to assess whether these departures from the Gauss-Markov assumptions could bias our results, we used two complementary approaches. First we used the “robcov” function of the “rms” package in order to get robust estimates of the effect significativity (Harrel 2015). Second, we performed a quantile regression using the “rq” function

(parameter tau set to 0.5, equivalent to a median regression) of the “quantreg” package for R (Koenker, 2016).

## Gene Ontology Enrichment

Eight thousand three hundreds and twenty five out of the 13,660 genes were associated with Gene Ontology (GO) terms. We tested genes at both ends of the  $F^*$  spectrum for GO terms enrichment using the same threshold percentile of 10% low / high noise genes as we did for the Reactome analysis. We carried out GO enrichment analyses using two different algorithms: “Parent-child” (Grossmann et al. 2007) and “Weight01”, a mixture of two algorithms developed by Alexa et al (Alexa et al. 2006). We kept only the terms that appeared simultaneously on both Parent-child and Weight01 under 10% significance level, controlling for multiple testing using the FDR method (Benjamini and Hochberg 1995).

## Additional data sets

The aforementioned analyses were additionally conducted on the data set of Shalek et al (Shalek et al. 2014). Following the filtering procedure established by the authors in the original paper, genes which did not satisfied the condition of being expressed by an amount such that  $\log(\text{TPM}+1) > 1$  in at least one of the 95 single cells were further discarded, where TPM stands for transcripts per million. This cut-off threshold resulted in 11,640 genes being kept for investigation. The rest of the analyses was conducted in the same way as in Sasagawa's data set.

All datasets and scripts to reproduce the results of this study are available at Figshare, under the DOI 10.6084/m9.figshare.4587169.

## Authors contributions

GVB and JYD designed the experiments and wrote the manuscript. GVB, NP and JYD conducted the analyses.

## Acknowledgements

The authors would like to thank Rafiq Neme-Garrido, Frederic Bartels and Estelle Renaud for fruitful discussions about this work, as well as Diethard Tautz for comments on an earlier version of this manuscript. JYD acknowledges funding from the Max Planck Society. This work was supported by the German Research Foundation (DFG), within the priority program (SPP) 1590.

# 615 **References**

- Alexa A, Rahnenführer J, Lengauer T. 2006. Improved scoring of functional groups from gene expression data by decorrelating GO graph structure. *Bioinformatics* 22:1600–1607.
- Arkin A, Ross J, Mcadams HH. 1998. Stochastic Kinetic Analysis of Developmental Pathway Bifurcation in Phage L-Infected Escherichia coli Cells. *Genetics* 149:1633–1648.
- Barabási A-L, Albert R. 1999. Emergence of Scaling in Random Networks. *Science* 286:509–513.
- Barabási A-L, Oltvai ZN. 2004. Network biology: understanding the cell’s functional organization. *Nature reviews. Genetics* 5:101–113.
- Bar-even A, Paulsson J, Maheshri N, Carmi M, Shea EO, Pilpel Y, Barkai N. 2006. Noise in protein expression scales with natural protein abundance. *Nature genetics* 38:636–643.
- Barkai N, Leibler S. 1999. Circadian clocks limited by noise. *Nature* 403:267–268.
- Becskei A, Kaufmann BB, van Oudenaarden A. 2005. Contributions of low molecule number and chromosomal positioning to stochastic gene expression. *Nature Genetics* 37:937–944.
- Becskei A, Serrano L. 2000. Engineering stability in gene networks by autoregulation. *Nature* 405:590–593.
- Benjamini Y, Hochberg Y. 1995. Controlling the False Discovery Rate: A Practical and Powerful Approach to Multiple Testing. *Journal of the Royal Statistical Society* 57:289–300.
- Blake WJ, Kærn M, Cantor CR, Collins JJ. 2003. Noise in eukaryotic gene expression. *Nature* 422:633–637.
- Chubb JR, Trcek T, Shenoy SM, Singer RH. 2006. Transcriptional Pulsing of a Developmental Gene. *Current Biology* 16:1018–1025.
- Croft D, Mundo AF, Haw R, Milacic M, Weiser J, Wu G, Caudy M, Garapati P, Gillespie M, Kamdar MR, et al. 2014. The Reactome pathway knowledgebase. *Nucleic Acids Research* 42:472–477.
- Csardi G, Nepusz T. 2006. The igraph software package for complex network research, *InterJournal, Complex Systems* 1695.

- Dixon JR, Selvaraj S, Yue F, Kim A, Li Y, Shen Y, Hu M, Liu JS, Ren B. 2012. Topological domains in mammalian genomes identified by analysis of chromatin interactions. *Nature* 485:376–380.
- Dray, S, Dufour, AB. 2007. The ade4 package: implementing the duality diagram for ecologists. *Journal of Statistical Software*. 22(4): 1-20.
- Dublanche Y, Michalodimitrakis K, Kümmerer N, Foglierini M, Serrano L. 2006. Noise in transcription negative feedback loops: simulation and experimental analysis. *Molecular systems biology* 2:41–41.
- Eldar A, Elowitz MB. 2010. Functional roles for noise in genetic circuits. *Nature* 467:167–173.
- Elowitz MB, Levine AJ, Siggia ED, Swain PS. 2002. Stochastic Gene Expression in a Single Cell. *Science* 297:1183–1186.
- Fraser HB, Hirsh AE, Giaever G, Kumm J, Eisen MB. 2004. Noise Minimization in Eukaryotic Gene Expression. *PLoS Biology* 2:0834–0838.
- Fraser HB, Hirsh AE, Steinmetz LM, Scharfe C, Feldman MW. 2002. Evolutionary Rate in the Protein Interaction Network. *Science* 296:750–752.
- Gillespie DT. 1977. Exact Simulation of Coupled Chemical Reactions. *The Journal of Physical Chemistry* 81:2340–2361.
- Grossmann S, Bauer S, Robinson PN, Vingron M. 2007. Improved detection of overrepresentation of Gene-Ontology annotations with parent – child analysis. *Bioinformatics* 23:3024–3031.
- Guimera R, Amaral LAN. 2005. Functional cartography of complex metabolic networks. *Nature* 433:895–900.
- Hahn MW, Conant GC, Wagner A. 2004. Molecular Evolution in Large Genetic Networks: Does Connectivity Equal Constraint? *Journal of Molecular Evolution* 58:203–211.
- Hahn MW, Kern AD. 2004. Comparative Genomics of Centrality and Essentiality in Three Eukaryotic Protein-Interaction Networks. *Molecular Biology and Evolution* 22:7–10.
- Harrell Jr, FE. 2016. rms: Regression Modeling Strategies. R package version 4.5-0.



- Hartwell LH, Hopfield JJ, Leibler S, Murray AW. 1999. From molecular to modular cell biology. *Nature* 402:C47–C52.
- Hebenstreit D. 2013. Are gene loops the cause of transcriptional noise? *Trends in Genetics* 29:333–338.
- Hirsh A, Fraser H. 2001. Protein dispensability and rate of evolution. *Nature* 411:1046–1049.
- Jacob F. 1977. Evolution and Tinkering. *Science* 196:1161–1166.
- Jeong H, Mason SP, Barabási A L, Oltvai ZN. 2001. Lethality and centrality in protein networks. *Nature* 411:41–42.
- Jeong H, Tombor B, Albert R, Oltvai ZN, Barabási A-L. 2000. The large-scale organization of metabolic networks. *Nature* 407:651–654.
- Jovelin R, Phillips PC. 2009. Evolutionary rates and centrality in the yeast gene regulatory network. *Genome biology* 10:R35–R35.
- Joy MP, Brock A, Ingber DE, Huang S. 2005. High-betweenness proteins in the yeast protein interaction network. *Journal of Biomedicine and Biotechnology* 2005:96–103.
- Kaufmann BB, van Oudenaarden A. 2007. Stochastic gene expression: from single molecules to the proteome. *Current opinion in genetics & development* 17:107–112.
- Kepler TB, Elston TC. 2001. Stochasticity in Transcriptional Regulation : Origins, Consequences, and Mathematical Representations. *Biophysical Journal* 81:3116–3136.
- Kim PM, Lu LJ, Xia Y, Gerstein MB. 2013. Relating Three-Dimensional Structures to Protein Networks Provides Evolutionary Insights. *Science* 603:1938–1941.
- Koenker, R. 2016. quantreg: Quantile Regression. R package version 5.29.
- Lehner B. 2008. Selection to minimise noise in living systems and its implications for the evolution of gene expression. *Molecular systems biology* 4:170–170.
- Luo, W, Brouwer C. 2013. Pathview: an R/Bioconductor package for pathway-based data integration and visualization. *Bioinformatics*, 29(14): 1830-1831.
- Maslov S, Sneppen K. 2002. Specificity and Stability in Topology of Protein Networks. *Science* 296:910–913.

- McAdams HH, Arkin A. 1997. Stochastic mechanisms in gene expression. *Proceedings of the National Academy of Sciences of the United States of America* 94:814–819.
- Metzger BPH, Yuan DC, Gruber JD, Duveau F, Wittkopp PJ. 2015. Selection on noise constrains variation in a eukaryotic promoter. *Nature* 521:344–347.
- Milborrow, S. 2016 Derived from mda:mars by Trevor Hastie and Rob Tibshirani. Uses Alan Miller's Fortran utilities with Thomas Lumley's leaps wrapper. earth: Multivariate Adaptive Regression Splines. R package version 4.4.7.
- Neme R, Tautz D. 2013. Phylogenetic patterns of emergence of new genes support a model of frequent de novo evolution. *BMC genomics* 14:117–117.
- Newman JRS, Ghaemmamghami S, Ihmels J, Breslow DK, Noble M, Derisi JL, Weissman JS. 2006. Single-cell proteomic analysis of *S. cerevisiae* reveals the architecture of biological noise. *Nature* 441:840–846.
- Newmann MEJ. 2003. The structure and function of complex networks. *SIAM Review* 45:167–256.
- Norman TM, Lord ND, Paulsson J, Losick R. 2015. Stochastic Switching of Cell Fate in Microbes. *Annual review of microbiology* 69:381–403.
- Ozbudak EM, Thattai M, Kurtser I, Grossman AD, Oudenaarden AV. 2002. Regulation of noise in the expression of a single gene. *Nature genetics* 31:69–73.
- Pál C, Papp B, Hurst LD. 2001. Highly Expressed Genes in Yeast Evolve Slowly. *Genetics* 158:927–931.
- Pedraza JM, van Oudenaarden A. 2005. Noise propagation in gene networks. *Science* 307:1965–1969.
- Pinheiro J, Bates D, DebRoy S, Sarkar D, R Core Team. 2017. *\_nlme: Linear and Nonlinear Mixed Effects Models\_*. R package version 3.1-129.
- Pombo A, Dillon N. 2015. Three-dimensional genome architecture: players and mechanisms. *Nature Reviews Molecular Cell Biology* 16:245–257.
- Pozhitkov, Alex E., Tautz D, Noble, Peter A. 2007. Oligonucleotide microarrays: widely applied & poorly understood. *Briefings in Functional Genomics and Proteomics*. 6:141–148.

- Raj A, Oudenaarden AV. 2008. Review Nature , Nurture , or Chance : Stochastic Gene Expression and Its Consequences. *Cell* 135:216–226.
- Raj A, Peskin CS, Tranchina D, Vargas DY, Tyagi S. 2006. Stochastic mRNA Synthesis in Mammalian Cells. *PLoS Biology* 4:e309–e309.
- Raser JM, O’Shea EK. 2005. Noise in Gene Expression: Origins, Consequences, and Control. *Science* 309.
- Sales, G, Calura, E, Romualdi, C. 2016. graphite: GRAPH Interaction from pathway Topological Environment. R package version 1.20.1.
- Sánchez A, Kondev J. 2008. Transcriptional control of noise in gene expression. *Proceedings of the National Academy of Sciences of the United States of America* 105:5081–5086.
- Sasagawa Y, Nikaido I, Hayashi T, Danno H, Uno KD, Imai T, Ueda HR. 2013. Quartz-Seq : a highly reproducible and sensitive single-cell RNA sequencing method , reveals non- genetic gene-expression heterogeneity. *Genome Biology* 14:R31–R31.
- Sauer U, Heineman M, Zamboni N. 2007. Getting Closer to the Whole Picture. *Science* 316:550–551.
- Shahrezaei V, Swain PS. 2008. The stochastic nature of biochemical networks. *Curr. Opin. Biotechnol.* 19:369–374.
- Shalek AK, Satija R, Adiconis X, Gertner RS, Gaublomme JT, Raychowdhury R, Schwartz S, Yosef N, Malboeuf C, Lu D, et al. 2013. Single-cell transcriptomics reveals bimodality in expression and splicing in immune cells. *Nature* 498:236–240.
- Shalek AK, Satija R, Shuga J, Trombetta JJ, Gennert D, Lu D, Chen P, Gertner RS, Gaublomme JT, Yosef N, et al. 2014. Single-cell RNA-seq reveals dynamic paracrine control of cellular variation. *Nature* 510:363–369.
- Sharon E, Van Dijk D, Kalma Y, Keren L, Manor O, Yakhini Z, Segal E. 2014. Probing the effect of promoters on noise in gene expression using thousands of designed sequences. *Genome Research* 24:1698–1706.
- So L, Ghosh A, Zong C, Sepúlveda LA, Segev R, Golding I. 2011. General properties of transcriptional time series in *Escherichia coli*. *Nature Genetics* 43:554–560.

- Spudich JL, Koshland DEJ. 1976. Non-genetic individuality: chance in the single cell. *Nature*:467–471.
- Suter DM, Molina N, Gatfield D, Schneider K, Schibler U, Naef F. 2011. Mammalian Genes Are Transcribed with Widely Different Bursting Kinetics. *Science* 332:472–474.
- Taniguchi Y, Choi PJ, Li G, Chen H, Babu M, Hearn J, Emili A, Xie XS. 2011. Quantifying *E. coli* Proteome and Transcriptome with Single-Molecule Sensitivity in Single Cells. *Science* (New York, N.Y.) 329:533–539.
- Tao Y, Zheng X, Sun Y. 2007. Effect of feedback regulation on stochastic gene expression. *J. Theor. Biol.* 247:827–836.
- Tautz D, Domazet-Lošo T. 2011. The evolutionary origin of orphan genes. *Nature reviews. Genetics* 12:692–702.
- Thattai M, Oudenaarden AV. 2001. Intrinsic noise in gene regulatory networks. *Proceedings of the National Academy of Sciences of the United States of America* 98:8614–8619.
- Thattai M, Oudenaarden AV. 2004. Stochastic Gene Expression in Fluctuating Environments. *Genetics* 167:523–530.
- Venables, W N, Ripley, B D. 2002. *Modern Applied Statistics with S*. Fourth Edition. Springer, New York.
- Vitkup D, Kharchenko P, Wagner A. 2006. Influence of metabolic network structure and function on enzyme evolution. *Genome biology* 7:R39–R39.
- Vu TN, Wills QF, Kalari KR, Niu N, Wang L, Rantalainen M, Pawitan Y. 2016. Beta-Poisson model for single-cell RNA-seq data analyses. *Bioinformatics*:1–8.
- Wang Z, Zhang J. 2011. Impact of gene expression noise on organismal fitness and the efficacy of natural selection. *Proceedings of the National Academy of Sciences* 108:E67–E76.
- Wolf L, Silander OK, van Nimwegen EJ. 2015. Expression noise facilitates the evolution of gene regulation. *eLife* 4:1–48.
- Wolf YI, Novichkov PS, Karev GP, Koonin EV, Lipman DJ. 2009. The universal distribution of evolutionary rates of genes and distinct characteristics of eukaryotic genes of different

apparent ages. *Proceedings of the National Academy of Sciences of the United States of America* 106:7273–7280.

Xie C, Zhang YE, Chen JY, Liu CJ, Zhou WZ, Li Y, Zhang M, Zhang R, Wei L, Li CY. 2012. Hominoid-Specific De Novo Protein-Coding Genes Originating from Long Non-Coding RNAs. *PLoS Genetics* 8:e1002942.-e1002942.

Yu G, He, Q. 2016 ReactomePA: an R/Bioconductor package for reactome pathway analysis and visualization. *Molecular BioSystems* 12(2):477-479.

Yu H, Kim PM, Sprecher E, Trifonov V, Gerstein M. 2007. The importance of bottlenecks in protein networks: Correlation with gene essentiality and expression dynamics. *PLoS Computational Biology* 3:713–720.

## 616 Tables

617

618 Table 1: GO terms significantly enriched in the 10% genes with lowest transcriptional noise.

|     | Ontology | GO ID      | GO term                            | FDR Fisher<br>"parent-child" | FDR Fisher<br>"weight01" |
|-----|----------|------------|------------------------------------|------------------------------|--------------------------|
|     | MF       | GO:0003676 | nucleic acid binding               | 2.406E-03                    | 1.475E-08                |
|     | MF       | GO:0003735 | structural constituent of ribosome | 6.099E-03                    | 1.708E-05                |
|     | BP       | GO:0006334 | nucleosome assembly                | 3.816E-03                    | 1.380E-02                |
|     | BP       | GO:0002227 | innate immune response in mucosa   | 6.727E-03                    | 2.018E-02                |
|     | BP       | GO:0006412 | translation                        | 1.257E-02                    | 1.380E-02                |
| 619 | CC       | GO:0000788 | nuclear nucleosome                 | 3.493E-05                    | 2.587E-05                |

620 Note: FDR: False Discovery Rate. MF: Molecular Function. BP: Biological Process. CC: Cellular  
621 Compartment.

622

623 Table 2: Correlation of transcriptional noise with genes centrality measures and pleiotropy.

|     | Measure         | Correlation with F* | p-value   |
|-----|-----------------|---------------------|-----------|
|     | Degree          | -0.071              | 6.271E-11 |
|     | Hub score       | -0.073              | 1.474E-11 |
|     | Authority score | -0.068              | 3.652E-10 |
|     | Closeness       | -0.005              | 6.633E-01 |
|     | Betweenness     | -0.014              | 2.061E-01 |
| 624 | Pleiotropy      | -0.049              | 1.149E-05 |

625 Note: All correlations are computed using Kendall's rank correlation test.

626 Table 3: Correlation of average transcriptional noise with pathway centrality measures.

| Measure                 | Correlation with average F* | p-value   |
|-------------------------|-----------------------------|-----------|
| Size                    | -0.059                      | 1.376E-03 |
| Diameter                | 0.012                       | 5.366E-01 |
| Average degree          | -0.172                      | 8.944E-21 |
| Average hub score       | -0.188                      | 1.724E-24 |
| Average authority score | -0.166                      | 2.487E-19 |
| Average closeness       | 0.050                       | 6.500E-03 |
| Average betweenness     | -0.166                      | 2.487E-19 |
| Average pleiotropy      | -0.137                      | 1.276E-13 |

628 Note: All correlations are computed using Kendall's rank correlation test.

629

630 Table 4: Linear models with F\* as the independent variable and SynthNet, gene age and Ka/Ks ratio  
631 as explanatory variables.

| Effect      | Estimate            | P-value      | Estimate               | P-value     |
|-------------|---------------------|--------------|------------------------|-------------|
|             | OLS                 |              | OLS + robust estimates |             |
| SynthNet1   | -0.051315           | 8.06E-16 *** | -0.0513                | <0.0001 *** |
| Age         | -0.028263           | 7.97E-05 *** | -0.0283                | <0.0001 *** |
| Ka/Ks       | -0.340854           | 0.474 NS     | -0.3409                | 0.4523      |
| Age : Ka/Ks | 0.040627            | 0.131 NS     | 0.0406                 | 0.1164      |
|             | Quantile regression |              | GLS                    |             |
| SynthNet1   | -0.04359            | <0.00001 *** | -0.0511684             | <0.0001 *** |
| Age         | -0.02616            | 0.01016 *    | -0.0283132             | 0.0001 ***  |
| Ka/Ks       | -0.18344            | 0.75452 NS   | -0.3370668             | 0.4789 NS   |
| Age : Ka/Ks | 0.03638             | 0.27612 NS   | 0.0404483              | 0.1330 NS   |

632  
633 Note: OLS: Ordinary Least Squares. GLS: Generalized Least Squares.



## 634 **Figures**

635 Figure 1: A systemic view of gene expression.

636 Figure 2: Transcriptional noise and mean gene expression. A) Measures of noise plotted against the  
637 mean gene expression for each gene, in logarithmic scales together with corresponding regression  
638 lines: variance, Fano factor (variance / mean), noise (square of the coefficient of variation,  
639 variance / mean<sup>2</sup>) and F\* (this study). B) Distribution of F\* over all genes in this study. Vertical  
640 line corresponds to F\* = 1.

641 Figure 3: Enriched pathways in the 10% genes with lowest transcriptional noise.

642 Figure 4: Correlation of F\* with synthetic centrality measure, gene age and Ka / Ks ratio.

643

## 644 **Supplementary material:**

645 Table S1: Correlation analyses with Shalek (2013) data set.

646 Table S2: Correlation analyses with pooled RNA-Seq data.

647 Figure S1: Impact of genome organization on the distribution of transcriptional noise. The x-axis  
648 shows the mean relative difference in transcriptional noise .Vertical lines show observed values and  
649 histograms the distribution over 1,000 permutations (see Methods). Left panel: distribution for  
650 neighbor genes along the genome. Right panel: distribution for genes in contact in three-  
651 dimensions.

652 Figure S2: Correlation of network measures. A) Correlation circle of network centrality measures.  
653 B) Proportion of total inertia explained by each principal component (bars) and cumulative  
654 proportion of inertia explained (lines).

655 Figure S3: Assortativity in networks. Assortativity for F\* and hub score are plotted against each  
656 other. Orange line: simple linear model. Blue line: “breakpoint” model. Vertical dashed line show  
657 the minimal value of hub score assortativity from which it has no effect on F\* assortativity.

# Figure 1

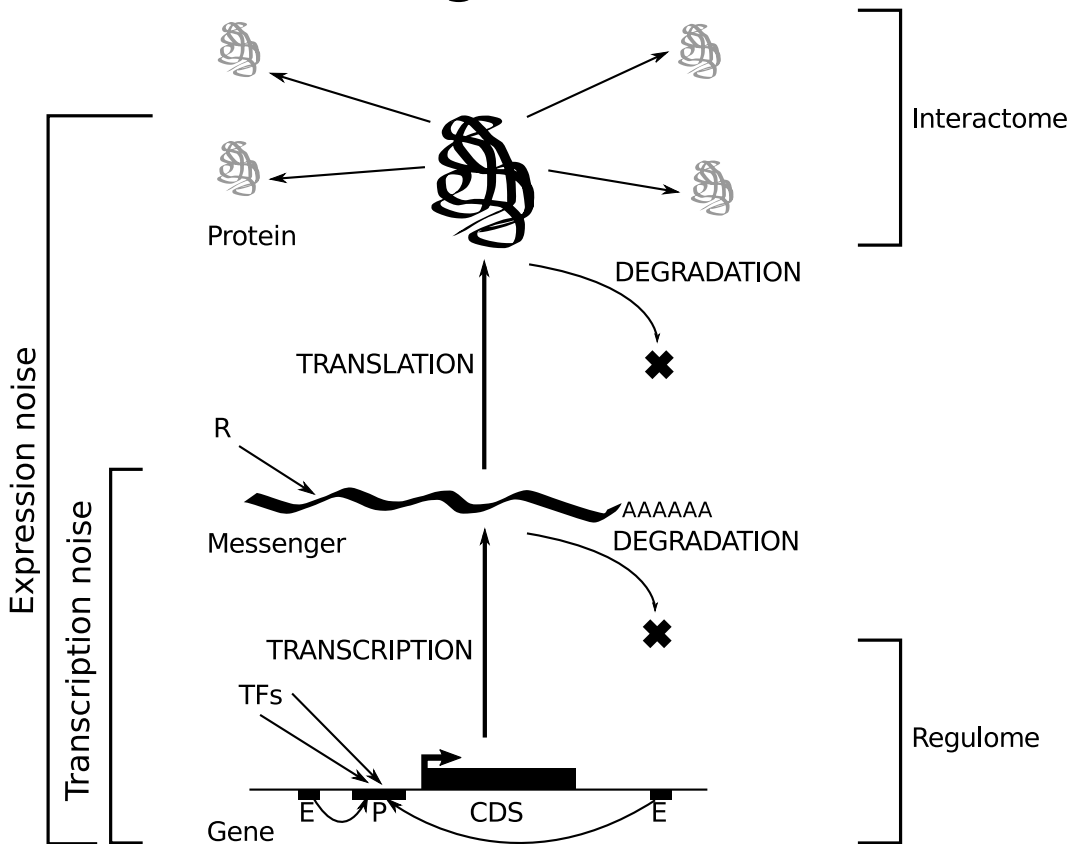

Figure 2

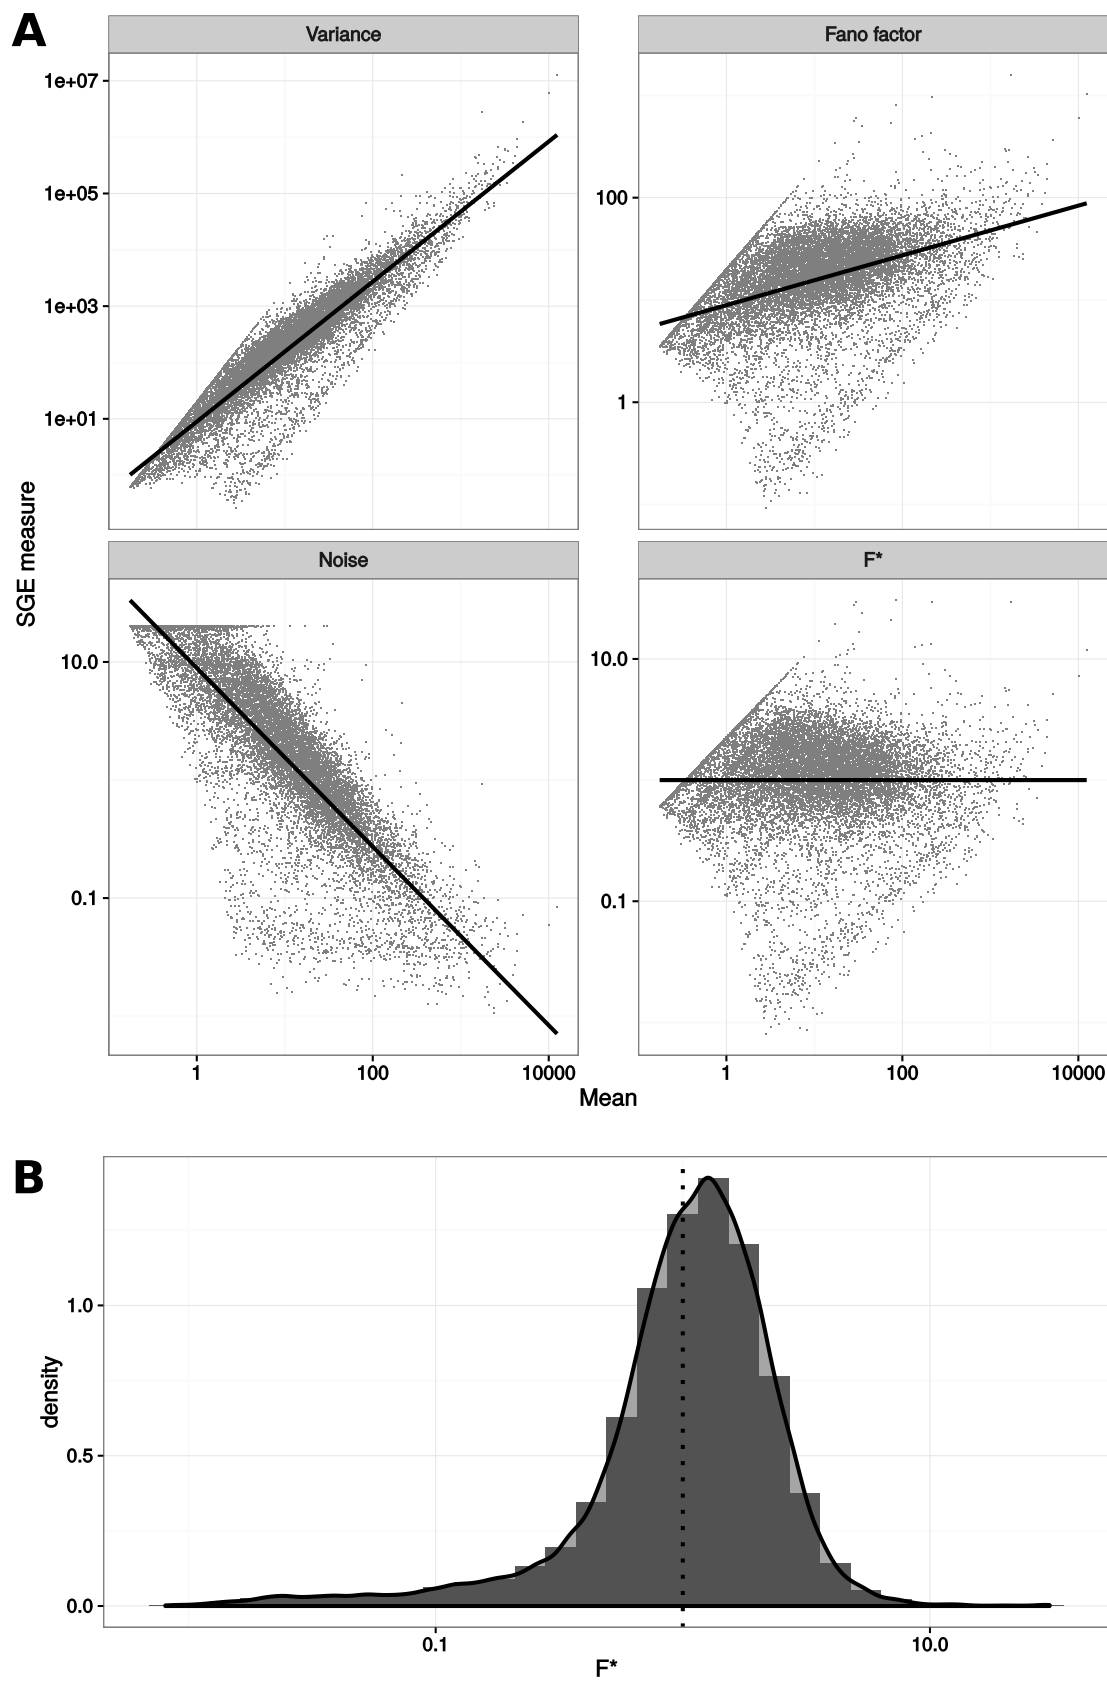

Figure 3

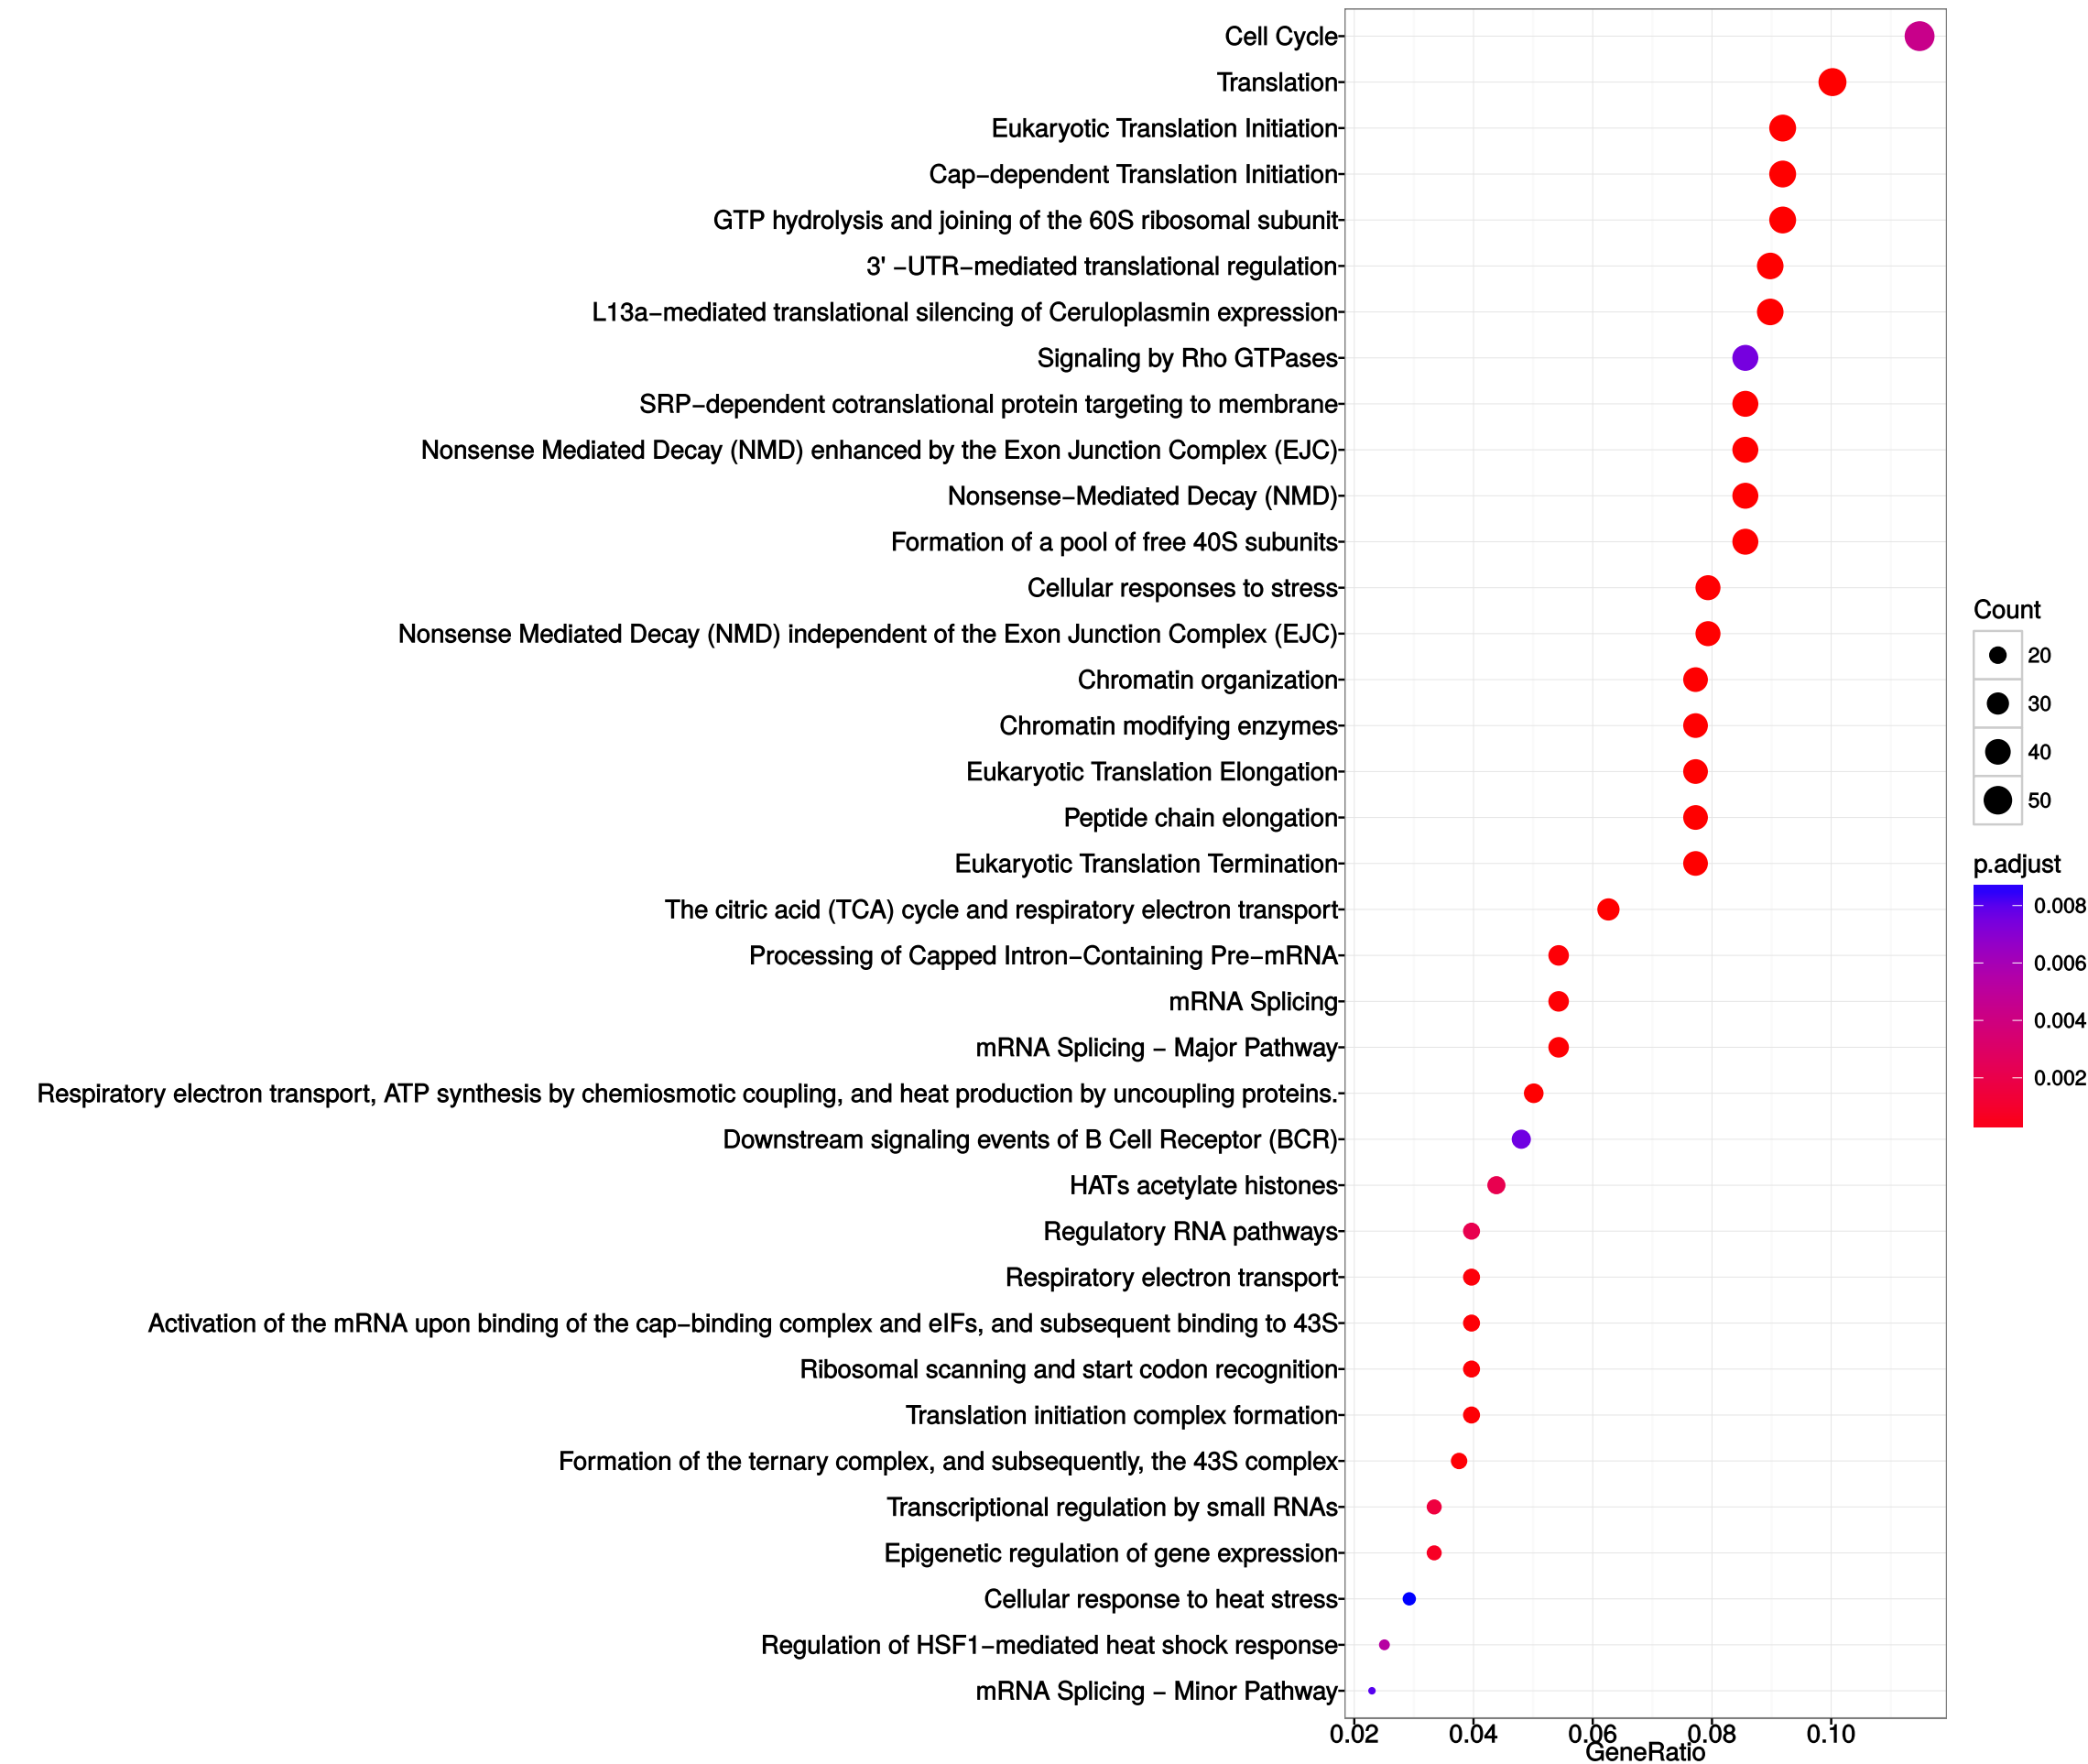

**Figure 4**

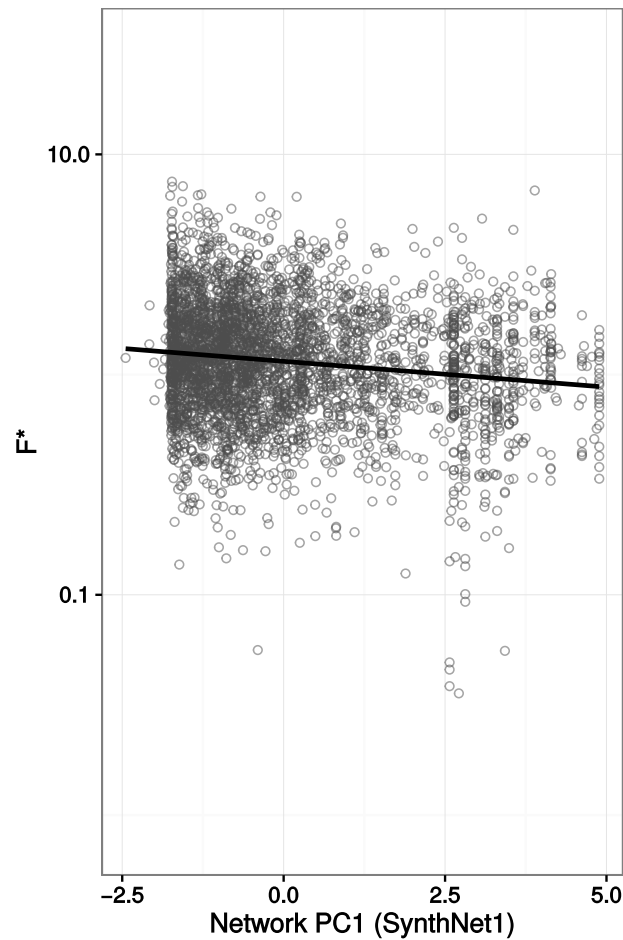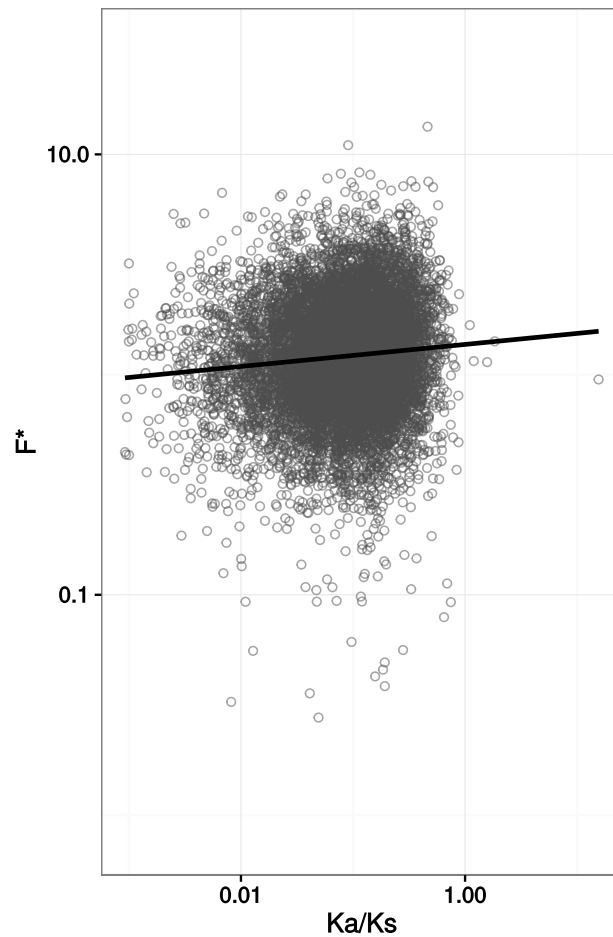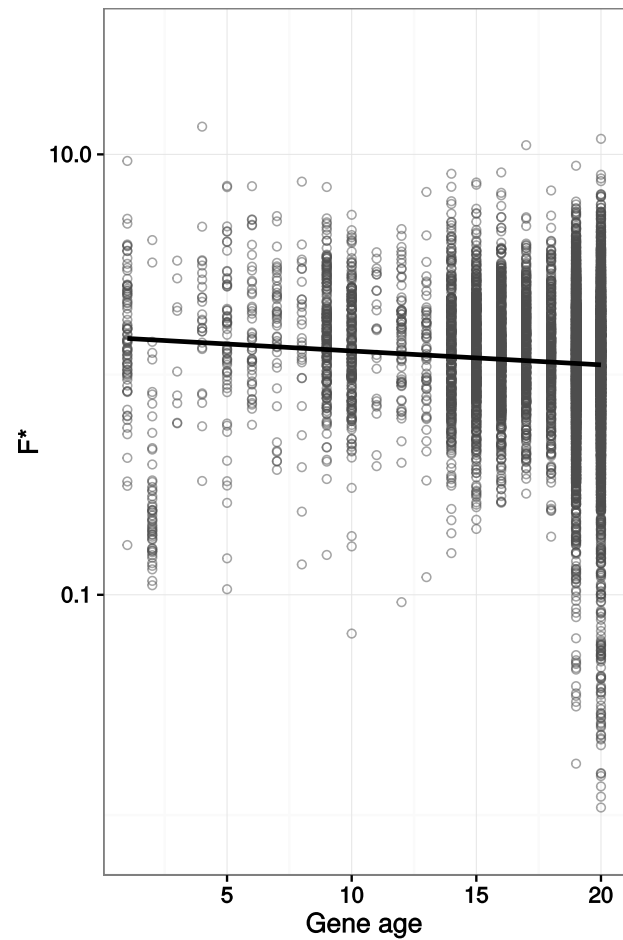

Source: http://biorxiv.org/content/10.1101/104216v2.full.pdf
